# Supplementary material for: Iron–cobalt nanoparticles dispersed in indium-based MIL-68-derived carbon nanosticks for water oxidation
Source: Royal Society of Chemistry journal article supplement (doi:10.1039/d4cy00746h), 2024-01-01
Supplement: d4cy00746h1.pdf [file d4cy00746h1.pdf]

## Supporting Information

### **Iron-cobalt nanoparticles dispersed in indium-based MIL-68-derived carbon nanosticks for water oxidation**

Haoran Wang, Nan Li, Yuting Fu, Junliang Chen, Jie Liu, Yuandong Yang, Shaojie Xu and Jinjie Qian\*

Key Laboratory of Carbon Materials of Zhejiang Province, College of Chemistry and Materials Engineering, Wenzhou University, Wenzhou, Zhejiang, 325000, P. R. China

657000, PR China

\*Corresponding Author.

E-mail address: jinjieqian@wzu.edu.cn

## 1. Experimental

### 1.1 Reagents and Materials.

All chemicals and solvents are used as purchased in this work without further purification: Terephthalic acid ( $\text{H}_2\text{BDC}$ , 97%), cobalt nitrate ( $\text{Co}(\text{NO}_3)_2 \cdot 6\text{H}_2\text{O}$ , AR, 99%, Aladdin), ferric nitrate ( $\text{Fe}(\text{NO}_3)_3 \cdot 6\text{H}_2\text{O}$ , AR, 99%, Aladdin), indium nitrate ( $\text{In}(\text{NO}_3)_2 \cdot 6\text{H}_2\text{O}$ , AR, 99%, Aladdin), deionized water (DI  $\text{H}_2\text{O}$ , 18  $\text{M}\Omega$ ), N,N'-dimethylformamide (DMF,  $\geq 99.8\%$ , Aladdin), ethanol (EtOH,  $>99\%$ , GC, Aladdin) and Nafion (5 wt%, DuPont).

### 1.2 Synthesis of MIL-68

After 30 minutes of ultrasonic treatment, the  $\text{In}(\text{NO}_3)_3 \cdot 6\text{H}_2\text{O}$  (250 mg) and  $\text{H}_2\text{BDC}$  (125 mg) are completely dissolved in solution of DMF (6.5 mL). Then, the homogeneous solution is transferred to a 25 mL glass bottle and placed in the oven at 85 °C for 6 hours. The obtained crystals are soaked in EtOH for 24 hours to replace the guest molecules and washed three times with EtOH to obtain the pure **MIL-68**.

### 1.3 Synthesis of MIL-68-FeCo/MIL-68-Fe/MIL-68-Co

$\text{Co}(\text{NO}_3)_2 \cdot 6\text{H}_2\text{O}$  (72 mg) +  $\text{Fe}(\text{NO}_3)_3 \cdot 6\text{H}_2\text{O}$  (28 mg) and **MIL-68** (30 mg) are mixed with DMF (3 mL) and  $\text{H}_2\text{O}$  (3 mL) in a pressure-resistant pipe, then heated at 120 °C for 6.5 hours. After cooling to room temperature, the product is collected by centrifugation at 10000 rpm, then washed three times with ethanol and finally vacuum-dried at 85 °C overnight.

The synthesis scheme for **MIL-68-Co** and **MIL-68-Fe** follows the same steps as the scheme outlined for **MIL-68-FeCo**, with the addition of  $\text{Co}(\text{NO}_3)_2 \cdot 6\text{H}_2\text{O}$  (100 mg) and  $\text{Fe}(\text{NO}_3)_3 \cdot 6\text{H}_2\text{O}$  (28 mg), respectively.

#### **1.4 Synthesis of MIL-68-C/MIL-68-Fe-C/MIL-68-Co-C/MIL-68-FeCo-C**

The as-obtained **MIL-68/MIL-68-Fe/MIL-68-Co/MIL-68-FeCo** is transferred into a chemical vapour deposition (CVD) tube furnace and carbonized at 850 °C for 2 hours under the Ar atmosphere (the heating rate of 10 °C min<sup>-1</sup>). The resultant samples are denoted as **MIL-68-C/MIL-68-Fe-C/MIL-68-Co-C/MIL-68-FeCo-C**.

## **2 Apparatus and Physical Measurement.**

### **2.1 General Instruments.**

Scanning electron microscopy (SEM) data are obtained within a JSM-6700F field emission scanning electron microscope at 10 kV. High-resolution transmission electron microscope (HR-TEM) and energy dispersive spectroscopy (EDS) are collected on a JEOL JEM2100F microscope at a high voltage of 200 kV. N<sub>2</sub> sorption is performed in the Accelerated Surface Area and Porosimetry System 2020 (ASAP 2020) at 77 K. The powder X-ray diffraction patterns (PXRD) are acquired with a Bruker D8 Advance using Cu K $\alpha$  radiation (0.154 nm). Raman spectra are obtained in Renishaw instrument (in Via-Reflex) with the 532 nm wavelength. X-ray photo electron spectroscopy (XPS) characterizations are carried out on a high resolution electron energy analyzer (Gamma data-Scienta SES 2002) using monochromatic Al K $\alpha$  X-rays.

### **2.2 Electrochemical Characterizations.**

All electrochemical data are collected by using a CHI760E and/or Autolab electrochemical workstation. The OER measurements are tested in 1.0 M KOH solution by utilizing a typical three-electrode system, the GCE (glass carbon electrode) with catalyst ink, a platinum net, and a Hg/HgO electrode as the working, counter, and reference electrodes, respectively. Meanwhile, we chose Hg/HgO as the reference electrode to guarantee accuracy and repeatability in the alkaline medium. All

electrochemical tests in our work are performed without iR corrected. We dispersed 5 mg of target powder with 50  $\mu\text{L}$  of Nafion (5%), 150  $\mu\text{L}$  DI  $\text{H}_2\text{O}$  and 300  $\mu\text{L}$  of ethanol, followed by the ultrasonic treatment for 2 h, and then a 6  $\mu\text{L}$  catalyst ink is dropped on the surface of a GCE electrode and allowed to dry under ambient conditions for 2-3 h. On the contrary, the cyclic voltammogram (CV) is conducted at a scan rate of 10/50  $\text{mV s}^{-1}$ ; meanwhile, the linear sweep voltammetry (LSV) is recorded at a scan rate of 5  $\text{mV s}^{-1}$ , and the electrochemical impedance spectroscopy (EIS) measurements are tested at the frequencies ranging from  $10^5$  to  $10^{-1}$  Hz, with 1.075 V (vs. RHE). The electrochemical double layer capacitance ( $C_{\text{dl}}$ ) curves of different samples are measured by using CVs in a non-Faradaic region (0.95-1.04 V vs RHE) at different scan rates of 20, 40, 60, 80, 100 and 120  $\text{mV s}^{-1}$ . Electrocatalytic stability is tested using the Amperometric i-t curve test at a consistent potential of 1.55 V (vs. RHE) for 20 h. All potentials of electrochemical measurement are transferred to the reversible hydrogen electrode (RHE) scale by the following equation:  $E_{\text{RHE}} = E_{\text{Hg}/\text{HgO}} + (0.059 \cdot \text{pH}) + 0.197$ , The overpotential ( $\eta$ ) is calculated as follows:  $\eta = E(\text{V vs. RHE}) - 1.23$ , according to  $\text{O}_2/\text{H}_2\text{O}$  equilibrium (1.23 V vs. RHE). The Tafel slope is transferred according to Tafel equation as follows:

$$\eta = b \cdot \log(j/j_0).$$

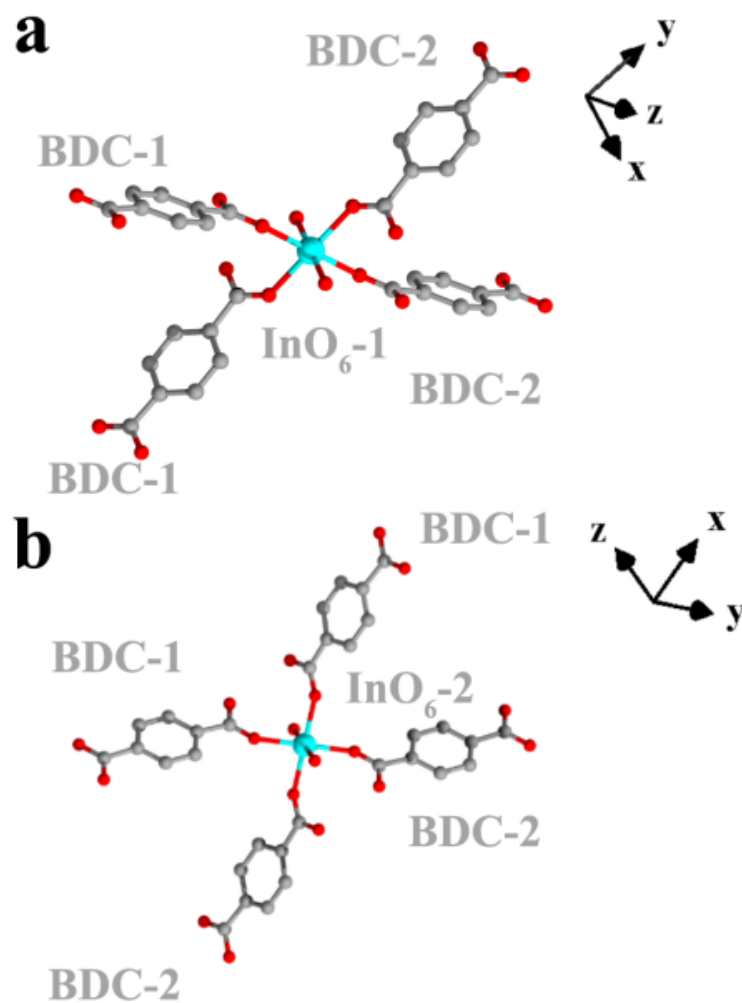

**Figure S1.** Coordination environments of two types of secondary building units of a) InO<sub>6</sub>-1; b) InO<sub>6</sub>-2 in the In-based MIL-68.

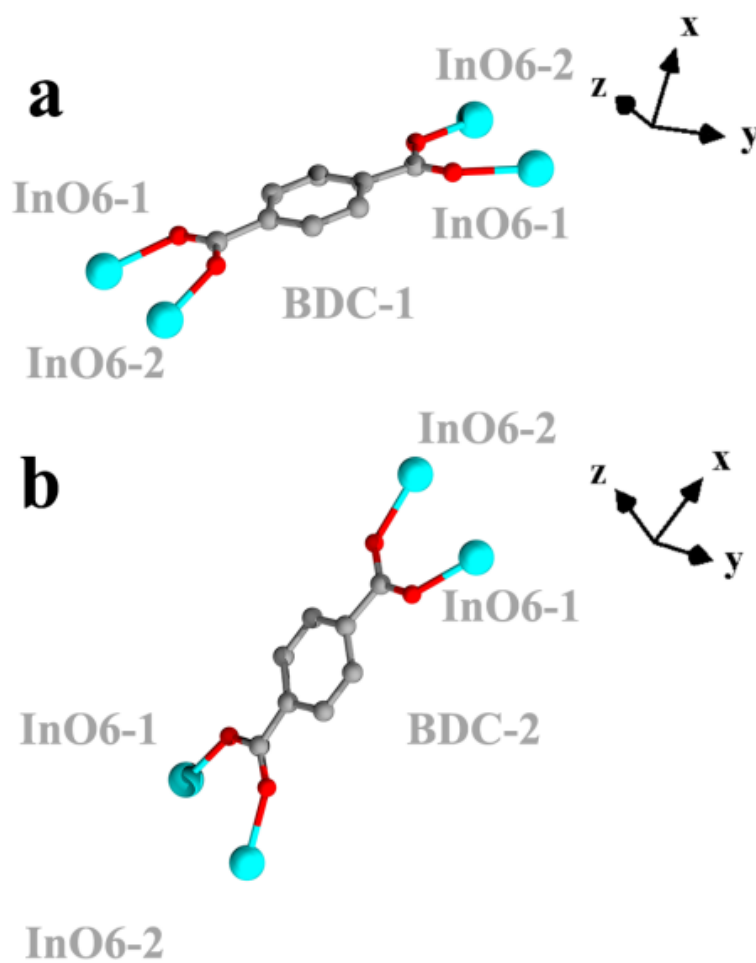

**Figure S2.** Coordination environments of two types of deprotonated BDC<sup>2-</sup> ligands of a) BDC-1; b) BDC-2 in the In-based MIL-68.

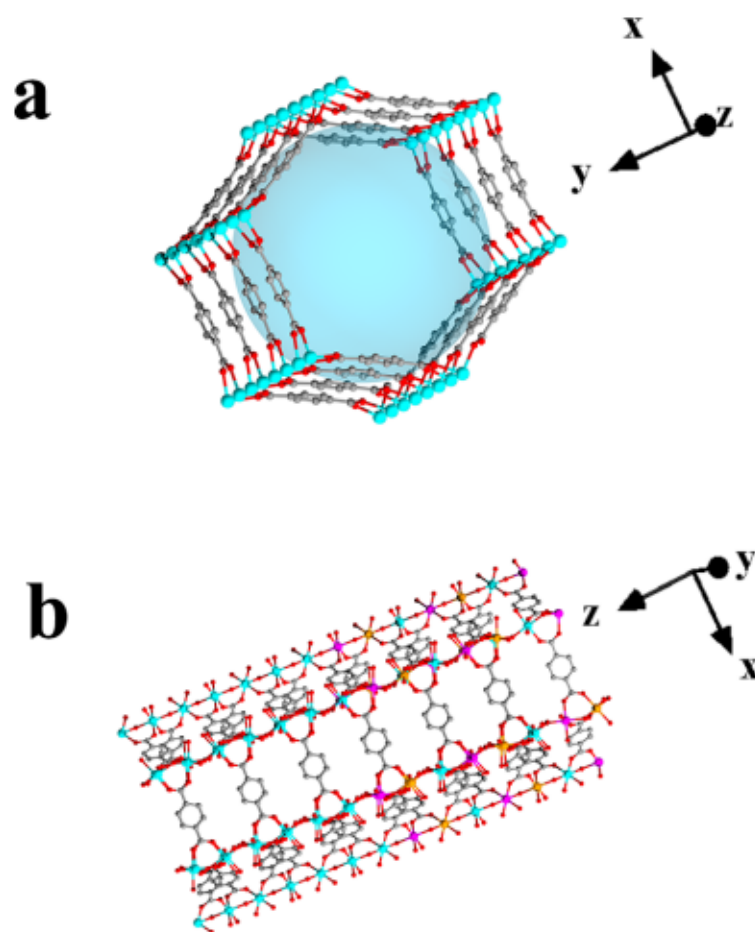

**Figure S3.** The side views of a) undoped MIL-68 and b) FeCo-doped MIL-68.



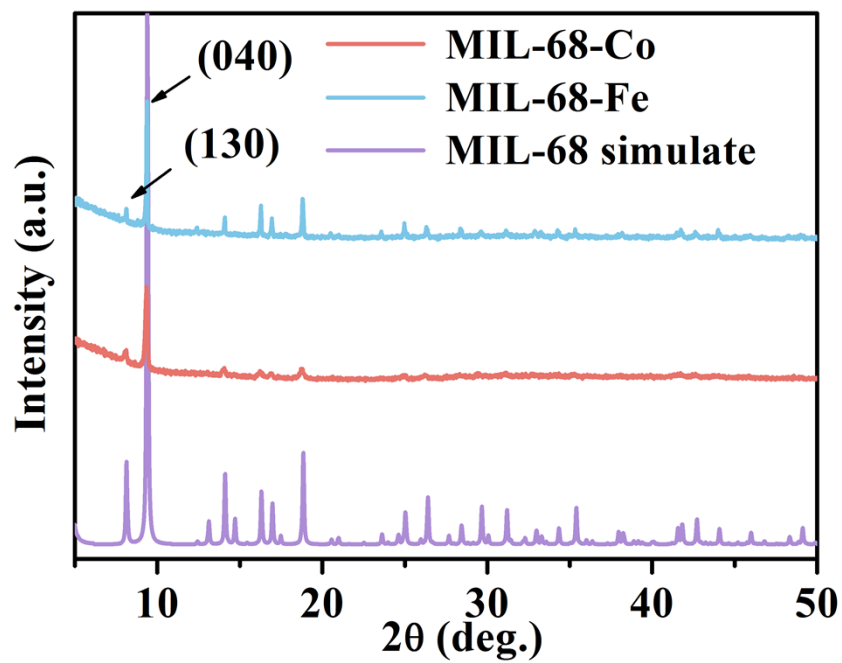

**Figure S4.** The PXRD patterns of MIL-68-Co and MIL-68-Fe.

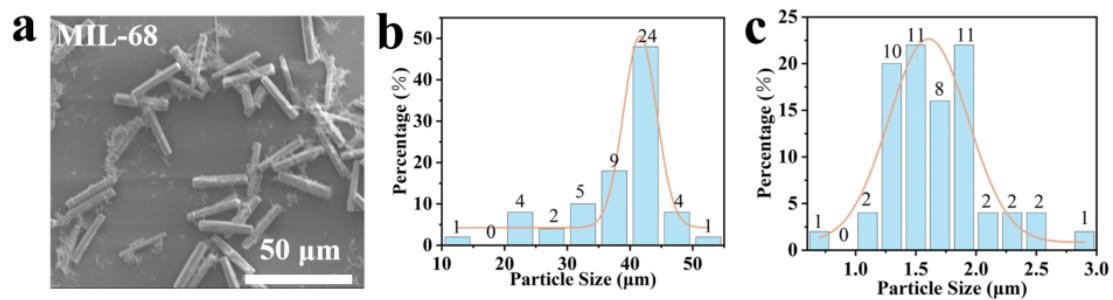

**Figure S5.** a) The SEM image of MIL-68; b-c) Particle size distribution of MIL-68.

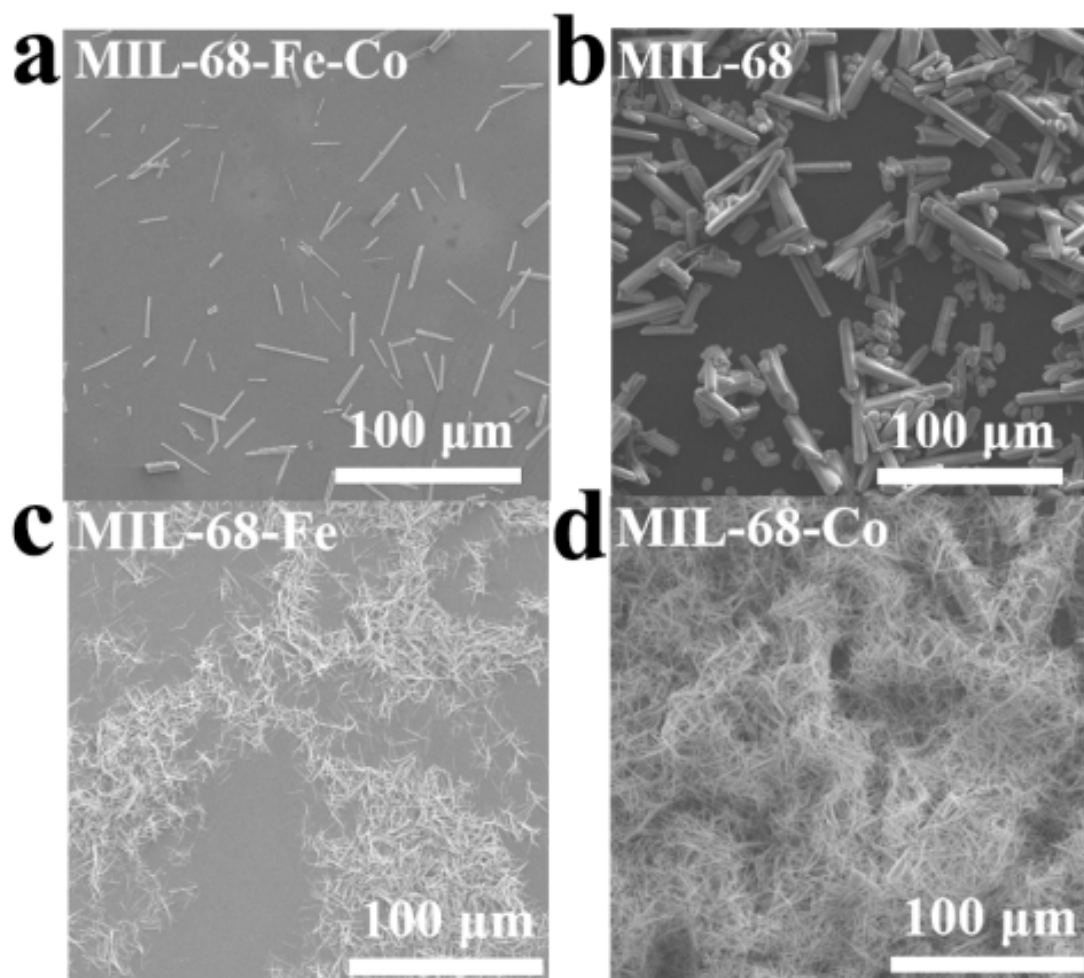

**Figure S6.** The SEM images of a) MIL-68-FeCo; b) MIL-68; c) MIL-68-Fe and d) MIL-68-Co.

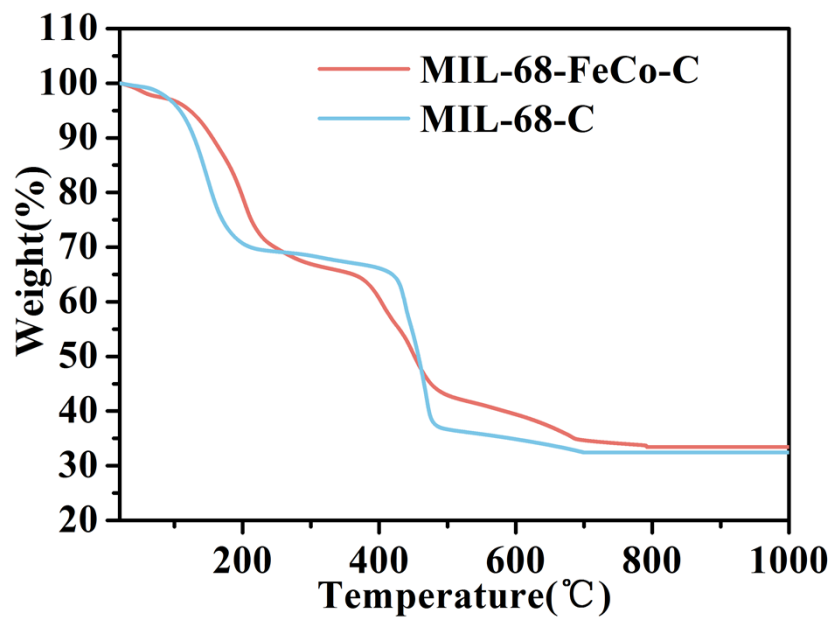

**Figure S7.** The TGA curves of MIL-68-FeCo-C and MIL-68-C.

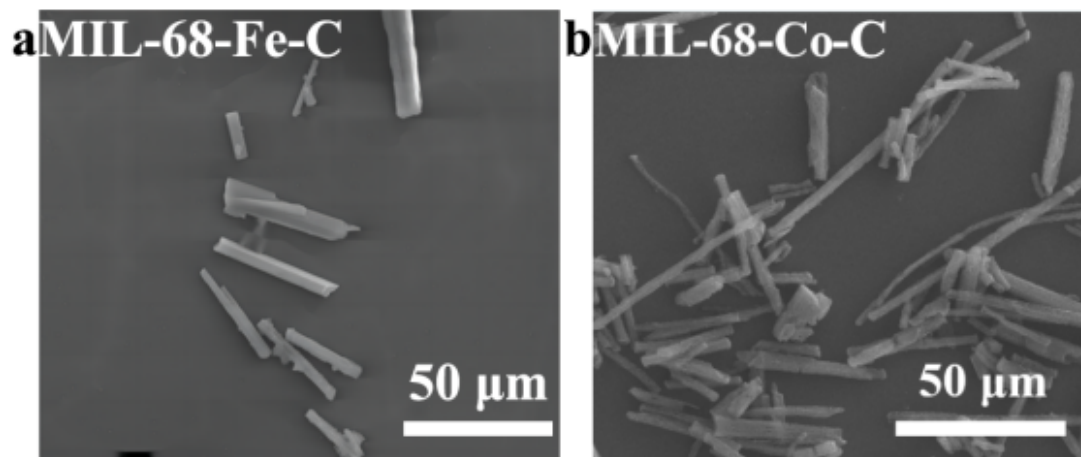

**Figure S8.** The SEM images of a) MIL-68-Fe-C; b) MIL-68-Co-C.

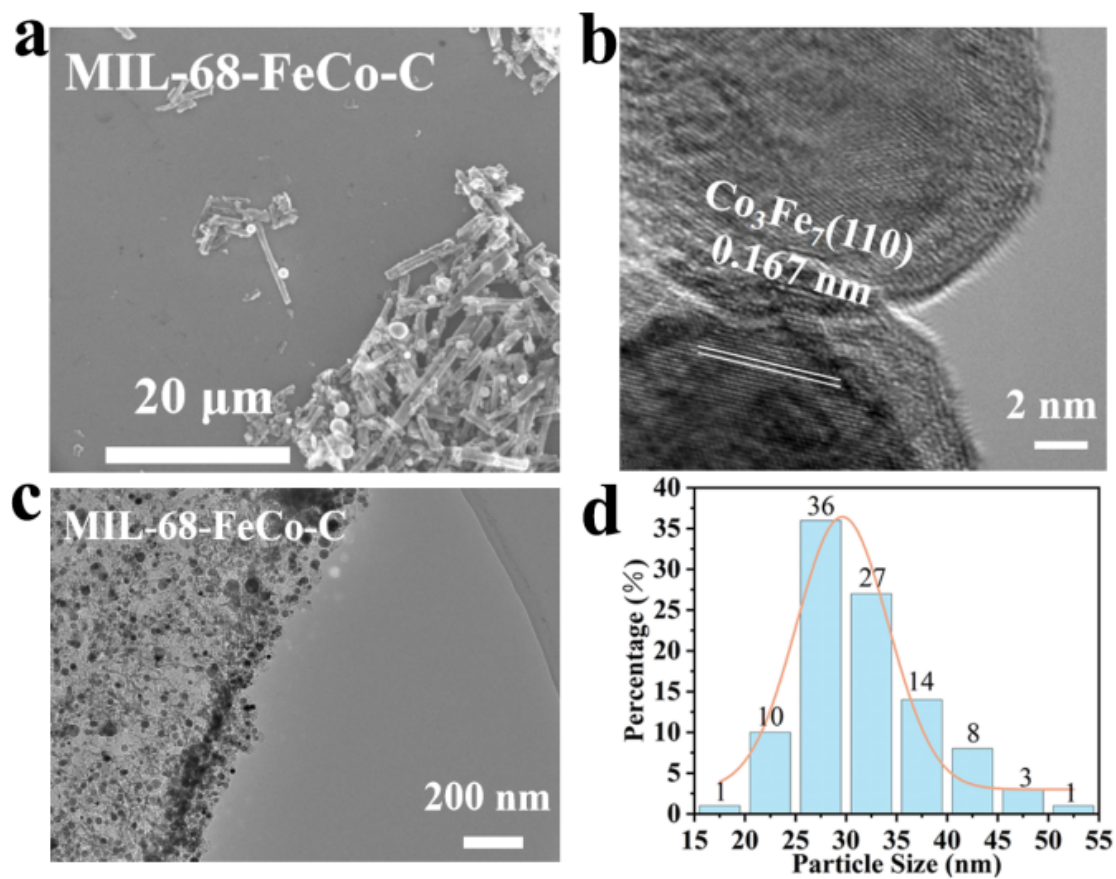

**Figure S9.** The SEM images of a) MIL-68-FeCo-C; b-c) TEM image of MIL-68-FeCo-C; d) Particle size distribution of FeCo alloy nanoparticles in MIL-68-FeCo-C.

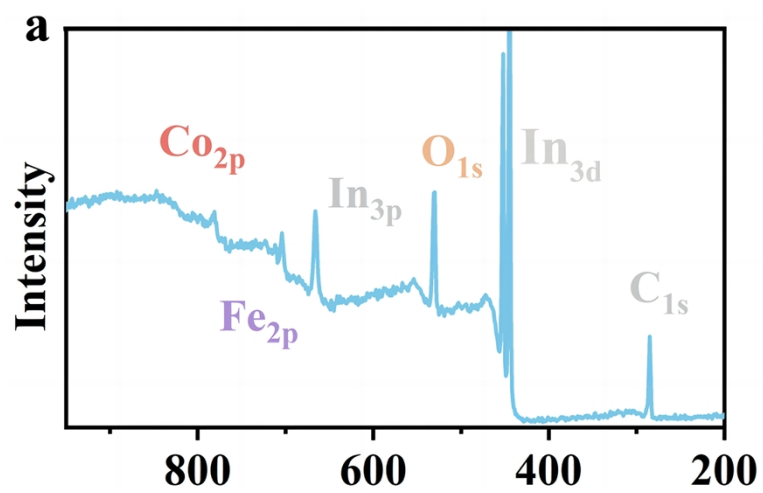

**Figure S10.** The full survey XPS spectrum of MIL-68-C-FeCo-C.

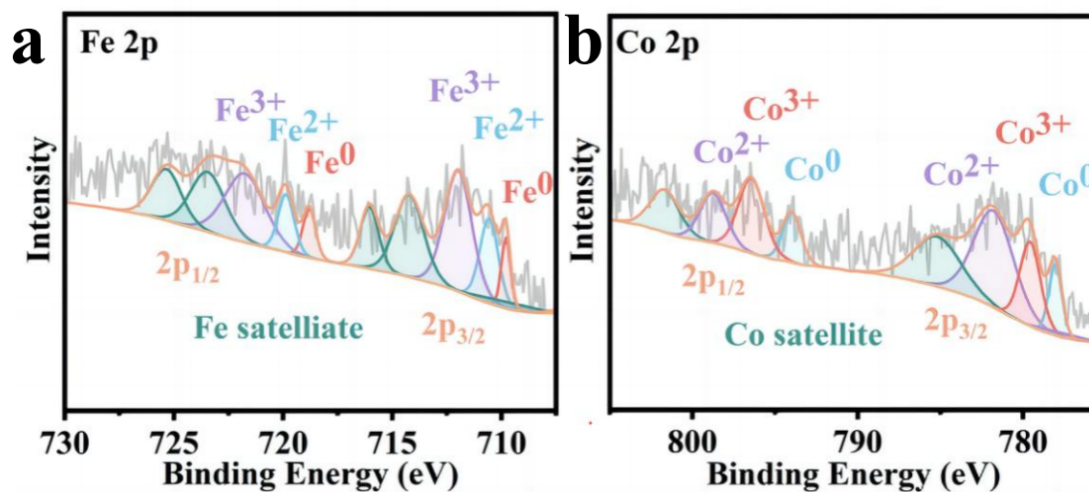

**Figure S11.** The high-resolution XPS spectra of (a) Fe 2p and (b) Co 2p for MIL-68-C-FeCo-C.



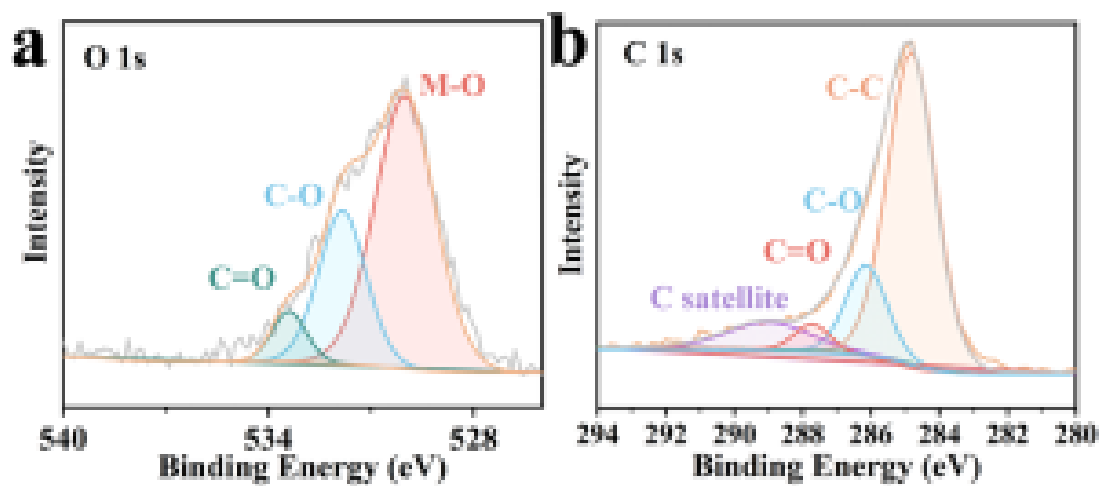

**Figure S12.** The high-resolution XPS spectra of (a) O 1s and (b) C 1s for MIL-68-C-FeCo-C.

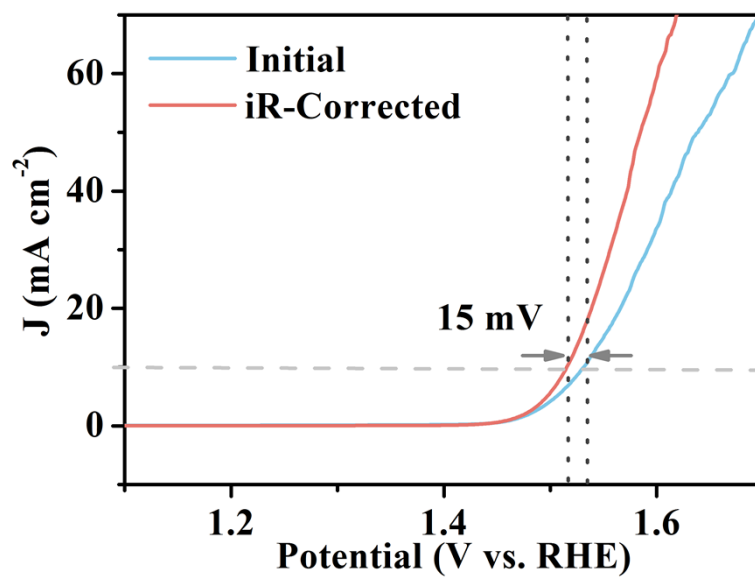

**Figure S13.** The LSV curves before and after iR-Corrected.

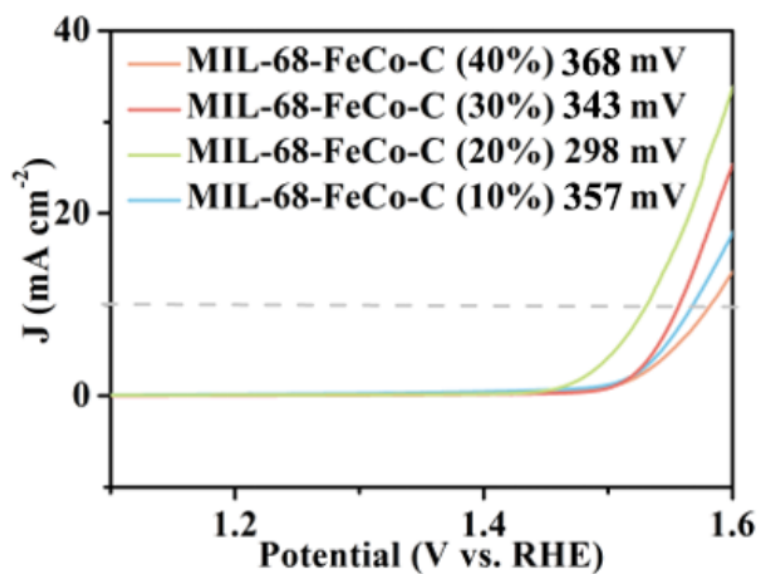

**Figure S14.** The LSV curves of various Fe/Co ratios in the MIL-68-FeCo-C series.

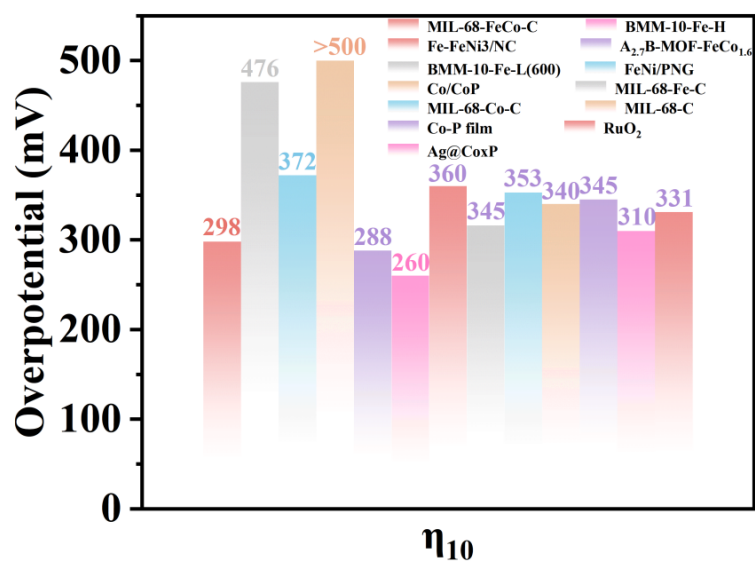

**Figure S15.** The  $\eta_{10}$  comparison of various electrocatalysts.

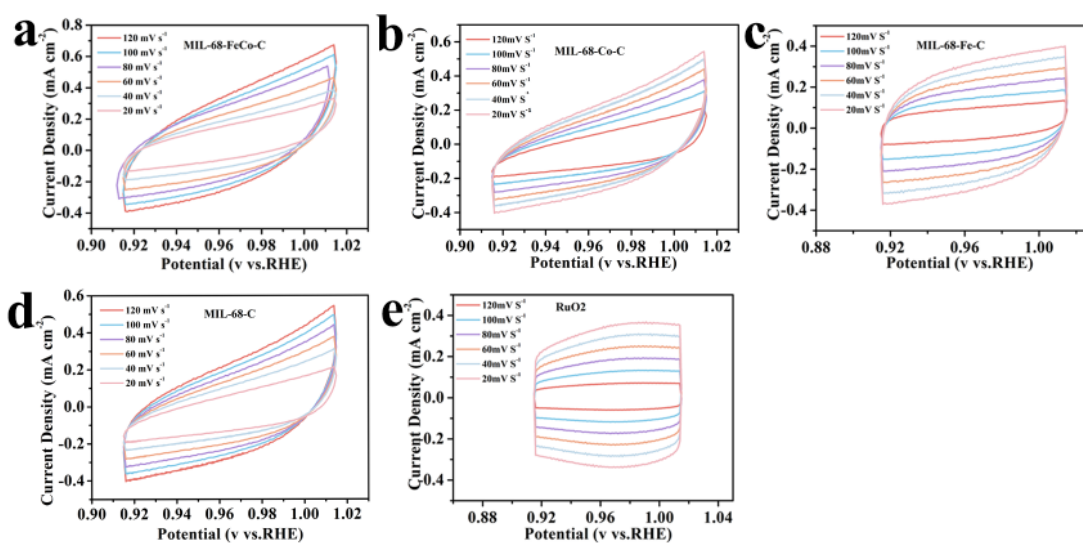

**Figure S16.** The CV curves from 20 to 120 mV s<sup>-1</sup> of (a) MIL-68-FeCo-C; (b) MIL-68-Co-C; (c) MIL-68-Fe-C; (d) MIL-68-C and (e) RuO<sub>2</sub> in 1.0 M KOH.

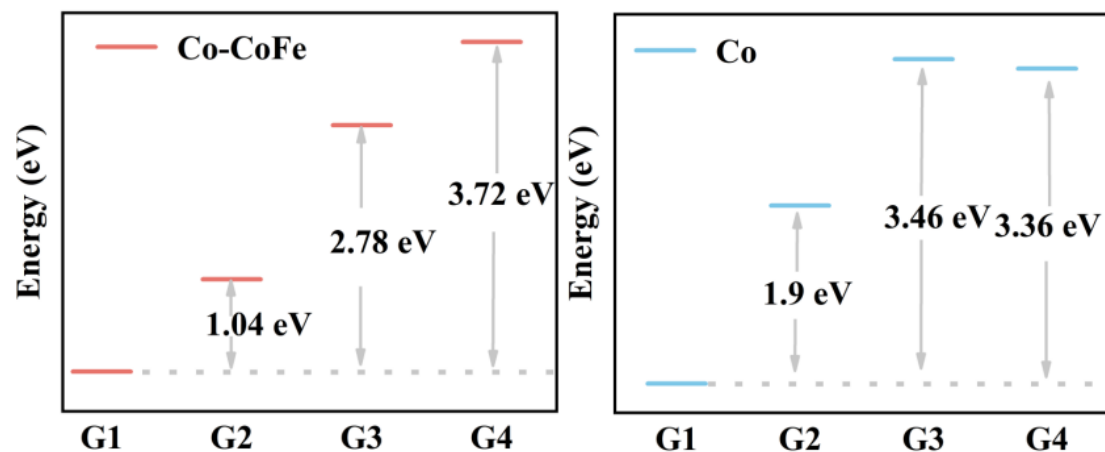

**Figure S17.** The calculated free energy diagrams of different surface models of Co-CoFe and Co with G1 values of 1.2 and 1.56 eV, respectively (**Ref<sup>1</sup>**).

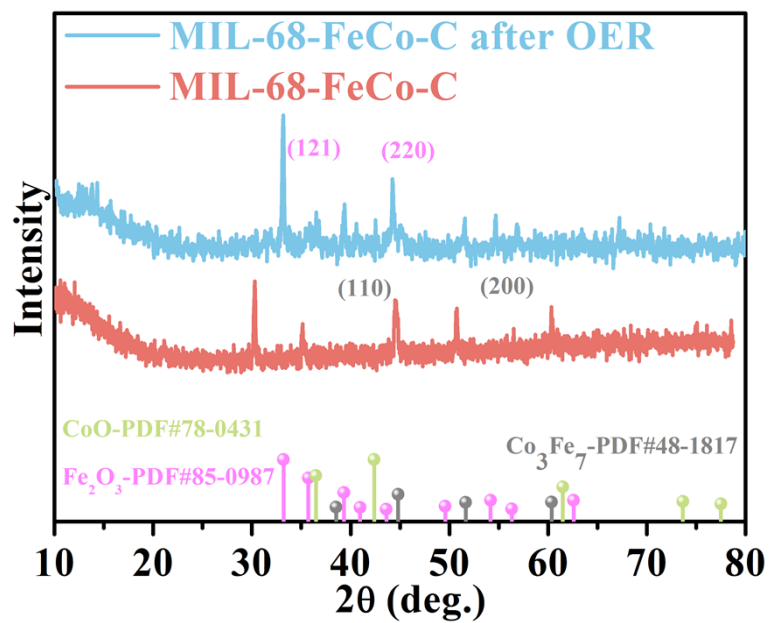

**Figure S18.** The PXRD patterns of MIL-68-FeCo-C before and after OER.

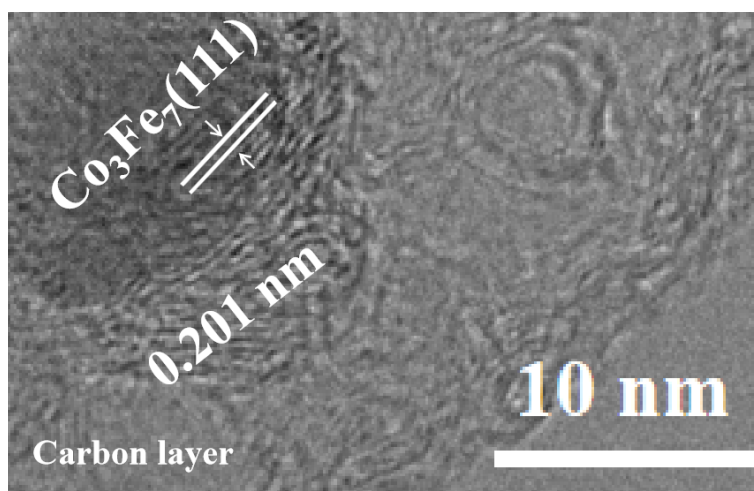

**Figure S19.** The TEM image of MIL-68-FeCo-C after OER.



**Table S1. Crystal Data for the In-based MIL-68.**

| Items                             | MIL-68                                                         |
|-----------------------------------|----------------------------------------------------------------|
| CCDC                              | 1811824                                                        |
| Formula                           | C <sub>24</sub> H <sub>0</sub> In <sub>3</sub> O <sub>15</sub> |
| Mass                              | 733.13                                                         |
| crystal system                    | Orthorhombic                                                   |
| space group                       | <i>Cmcm</i>                                                    |
| <i>a</i> (Å)                      | 21.892(10)                                                     |
| <i>b</i> (Å)                      | 37.916(8)                                                      |
| <i>c</i> (Å)                      | 7.2570(15)                                                     |
| $\alpha$ (°)                      | 90.00                                                          |
| $\beta$ (°)                       | 90.00                                                          |
| $\gamma$ (°)                      | 90.00                                                          |
| <i>V</i> (Å <sup>3</sup> )        | 6024(3)                                                        |
| <i>T</i> (K)                      | 125(2)                                                         |
| <i>Z</i>                          | 4                                                              |
| F(000)                            | 1644                                                           |
| R <sub>int</sub>                  | 0.0179                                                         |
| R <sub>1</sub> (I>2σ(I))          | 0.0837                                                         |
| wR <sub>2</sub> (all reflections) | 0.1922                                                         |

**Ref.<sup>2</sup>:** For more details on the crystal structure data, please see the previously published works, *Inorganic Chemistry*, 2008, **47**, 11892-11901.

**Table S2. Electrochemical Parameters of MIL-68-FeCo-C, MIL-68-Fe-C, MIL-68-Co-C, MIL-68-C, RuO<sub>2</sub>.**

| <b>Samples</b>   | <b><math>\eta_{10}</math><br/>(mV)</b> | <b>Tafel slope<br/>(mV dec<sup>-1</sup>)</b> | <b><math>C_{dl}</math><br/>(mF cm<sup>-2</sup>)</b> | <b><math>R_{ct}</math><br/>(<math>\Omega</math>)</b> |
|------------------|----------------------------------------|----------------------------------------------|-----------------------------------------------------|------------------------------------------------------|
| MIL-68-FeCo-C    | 298                                    | 58.6                                         | 2.80                                                | 5.75                                                 |
| MIL-68-Fe-C      | 476                                    | 85.9                                         | 1.59                                                | 18.4                                                 |
| MIL-68-Co-C      | 372                                    | 63.3                                         | 1.28                                                | 19.0                                                 |
| MIL-68-C         | > 500                                  | 106.7                                        | 1.16                                                | 23.2                                                 |
| RuO <sub>2</sub> | 331                                    | 60.7                                         | 2.26                                                | 183.8                                                |

**Table S3. OER Performance Comparison between MIL-68-FeCo-C and Other Electrode Materials.**

| Samples                                                | Electrolyte      | $\eta_{10}$<br>(mV) | Tafel slope<br>(mV dec <sup>-1</sup> ) | Reference                |
|--------------------------------------------------------|------------------|---------------------|----------------------------------------|--------------------------|
| <b>MIL-68-FeCo-C</b>                                   | <b>1.0 M KOH</b> | <b>298</b>          | <b>58.6</b>                            | <b>This work</b>         |
| A <sub>2.7</sub> B-MOF-FeCo <sub>1.6</sub>             | 1.0 M KOH        | 288                 | 39.0                                   | <b>Ref.<sup>3</sup></b>  |
| BMM-10-Fe-H                                            | 1.0 M KOH        | 260                 | 137.4                                  | <b>Ref.<sup>4</sup></b>  |
| FeCoSe@NCNSs                                           | 1.0 M KOH        | 320                 | 95.1                                   | <b>Ref.<sup>5</sup></b>  |
| BMM-10-Fe-L(600)                                       | 1.0 M KOH        | 316                 | 119.8                                  | <b>Ref.<sup>6</sup></b>  |
| Fe-NiO/NF                                              | 1.0 M NaOH       | 305                 | 65.3                                   | <b>Ref.<sup>7</sup></b>  |
| NP/NiO                                                 | 1.0 M NaOH       | 332                 | 65.6                                   | <b>Ref.<sup>8</sup></b>  |
| CuO-NiO/NF                                             | 1.0 M NaOH       | 319                 | 86.4                                   | <b>Ref.<sup>9</sup></b>  |
| Ni-MOF@Fe-MOF                                          | 1.0 M KOH        | 265                 | 82.0                                   | <b>Ref.<sup>10</sup></b> |
| FeNi/PNG                                               | 1.0 M KOH        | 353                 | 80.0                                   | <b>Ref.<sup>11</sup></b> |
| Co/CoP                                                 | 1.0 M KOH        | 340                 | 79.5                                   | <b>Ref.<sup>12</sup></b> |
| Co-P film                                              | 1.0 M KOH        | 345                 | 47.0                                   | <b>Ref.<sup>13</sup></b> |
| Ni <sub>3</sub> Fe-Co <sub>9</sub> S <sub>8</sub> /rGO | 0.1 M KOH        | 390                 | 109.8                                  | <b>Ref.<sup>14</sup></b> |
| Co <sub>2</sub> P/CNT-900                              | 1.0 M KOH        | 292                 | 68.0                                   | <b>Ref.<sup>15</sup></b> |
| Ag@Co <sub>x</sub> P                                   | 1.0 M KOH        | 310                 | 76.4                                   | <b>Ref.<sup>16</sup></b> |
| Fe-FeNi <sub>3</sub> /NC                               | 0.1 M KOH        | 360                 | 82.0                                   | <b>Ref.<sup>17</sup></b> |

The loading mass of the catalyst in this work is 0.85 mg cm<sup>-2</sup>.

## References

1. J. Chen, H. Li, S. Chen, J. Fei, C. Liu, Z. Yu, K. Shin, Z. Liu, L. Song, G. Henkelman, L. Wei and Y. Chen, *Advanced Energy Materials*, 2021, **11**, 2003412, 1614-6832.
2. C. Volkringer, M. Meddouri, T. Loiseau, N. Guillou, J. Marrot, G. Férey, M. Haouas, F. Taulelle, N. Audebrand and M. Latroche, *Inorganic Chemistry*, 2008, **47**, 11892-11901, 0020-1669.
3. Z. Xue, Y. Li, Y. Zhang, W. Geng, B. Jia, J. Tang, S. Bao, H.-P. Wang, Y. Fan, Z.-w. Wei, Z. Zhang, Z. Ke, G. Li and C.-Y. Su, *Advanced Energy Materials*, 2018, **8**, 1801564, 1614-6832.
4. J. Ding, Q. Sun, L. Zhong, X. Wang, L. Chai, Q. Li, T.-T. Li, Y. Hu, J. Qian and S. Huang, *Electrochimica Acta*, 2020, **354**, 136716, 0013-4686.
5. Y. Pan, M. Wang, M. Li, G. Sun, Y. Chen, Y. Liu, W. Zhu and B. Wang, *Journal of Energy Chemistry*, 2022, **68**, 699-708, 20954956.
6. L. Zhong, X. Wang, Y. Guo, J. Ding, Q. Huang, T.-T. Li, Y. Hu, J. Qian and S. Huang, *ACS Applied Materials & Interfaces*, 2021, **13**, 55454-55462, 1944-8244.
7. Z. Qiu, Y. Ma and T. Edvinsson, *Nano Energy*, 2019, **66**, 22112855.
8. D. Xiong, C. Lu, C. Chen, J. Wang, Y. Kong, T. Liu, S. Ying and F.-Y. Yi, *Journal of Power Sources*, 2022, **520**, 03787753.
9. Z. Wang, J. Ang, B. Zhang, Y. Zhang, X. Y. D. Ma, T. Yan, J. Liu, B. Che, Y. Huang and X. Lu, *Applied Catalysis B: Environmental*, 2019, **254**, 26-36, 09263373.
10. K. Rui, G. Zhao, Y. Chen, Y. Lin, Q. Zhou, J. Chen, J. Zhu, W. Sun, W. Huang and S. X. Dou, *Advanced Functional Materials*, 2018, **28**, 1616-301X 1616-3028.
11. H. Wang, X. Feng, M. Zhou, X. Bo and L. Guo, *ACS Applied Nano Materials*, 2020, **3**, 6336-6343
12. Z.-H. Xue, H. Su, Q.-Y. Yu, B. Zhang, H.-H. Wang, X.-H. Li and J.-S. Chen, *Advanced Energy Materials*, 2017, **7**, 16146832.
13. N. Jiang, B. You, M. Sheng and Y. Sun, *Angewandte Chemie International Edition*, 2015, **54**, 6251-6254, 14337851.
14. X. Hu, T. Huang, Y. Tang, G. Fu and J.-M. Lee, *ACS Applied Materials & Interfaces*, 2019, **11**, 4028-4036, 1944-8244.
15. D. Das and K. K. Nanda, *Nano Energy*, 2016, **30**, 303-311, 22112855.
16. Y. Hou, Y. Liu, R. Gao, Q. Li, H. Guo, A. Goswami, R. Zboril, M. B. Gawande and X. Zou, *ACS Catalysis*, 2017, **7**, 7038-7042, 2155-5435 2155-5435.
17. K. Chen, S. Kim, R. Rajendiran, K. Prabakar, G. Li, Z. Shi, C. Jeong, J. Kang and O. L. Li, *Journal of Colloid and Interface Science*, 2021, **582**, 977-990, 0021-9797.
